# Supplementary material for: Resting metabolic rate and its adjustments as predictors of risk protein-energy wasting in hemodialysis patients
Source: Oxford University Press journal article supplement (doi:10.1042/bsr20210010), 2021-03-11
Supplement: bsr-2021-0010_supp.pdf [file bsr-2021-0010_supp.pdf]

**Table S1 Multivariate linear regression analysis using rest metabolic rate in hemodialysis patients**

|                   | All                            |        |        | Age<65                         |        |        | Age≥65                         |        |        | Male                           |        |        | Female                         |        |        |
|-------------------|--------------------------------|--------|--------|--------------------------------|--------|--------|--------------------------------|--------|--------|--------------------------------|--------|--------|--------------------------------|--------|--------|
|                   | (R <sup>2</sup> =0.796, N=774) |        |        | (R <sup>2</sup> =0.770, N=546) |        |        | (R <sup>2</sup> =0.877, N=228) |        |        | (R <sup>2</sup> =0.745, N=478) |        |        | (R <sup>2</sup> =0.720, N=296) |        |        |
|                   | β                              | β1     | P      | β                              | β1     | P      | β                              | β1     | P      | β                              | β1     | P      | β                              | β1     | P      |
| BCM, kg           | 30.61<br>(27.91,33.31)         | 0.646  | <0.001 | 29.46<br>(26.14,32.77)         | 0.635  | <0.001 | 34.21<br>(29.81,38.42)         | 0.657  | <0.001 | 24.44<br>(21.23,27.65)         | 0.585  | <0.001 | 24.76<br>(19.09,30.44)         | 0.448  | <0.001 |
| LCC, cm           | 12.86<br>(9.17,16.55)          | 0.198  | <0.001 | 10.97<br>(6.71,15.24)          | 0.185  | <0.001 | 26.49<br>(18.97,34.00)         | 0.302  | <0.001 | 12.17<br>(8.24,16.10)          | 0.239  | <0.001 | 17.86<br>(10.32,25.41)         | 0.285  | <0.001 |
| Fat mass, kg      | -4.69<br>(-6.66,-2.73)         | -0.122 | <0.001 | -4.24<br>(-6.75,-1.73)         | -0.110 | 0.001  | -6.33<br>(-9.25,-3.41)         | -0.164 | <0.001 | -5.01<br>(-7.27,-2.76)         | -0.159 | <0.001 | -                              | -      | -      |
| Capacitance,<br>F | 0.17<br>(0.10,0.25)            | 0.120  | <0.001 | 0.13<br>(0.03,0.23)            | 0.091  | 0.009  | 0.22<br>(0.11,0.33)            | 0.153  | <0.001 | 0.13<br>(0.04,0.21)            | 0.112  | 0.003  | 0.20<br>(0.07,0.34)            | 0.152  | 0.003  |
| Scr, umo/L        | -                              | -      | -      | -                              | -      | -      | -                              | -      | -      | -                              | -      | -      | -0.07<br>(-0.14,-0.01)         | -0.103 | 0.036  |

2 Abbreviation: β 1, standardized coefficient; BCM, body cell mass; LCC, left calf circumference; Scr, serum creatinine.

**Table S2 RMR and its adjusted value for predicting PEW risk in hemodialysis patients**

|                              | All     |             |             | Age<65  |             |             | Age $\geq$ 65 |             |             | Male    |             |             | Female  |             |             |
|------------------------------|---------|-------------|-------------|---------|-------------|-------------|---------------|-------------|-------------|---------|-------------|-------------|---------|-------------|-------------|
|                              | Cut-off | Sensitivity | Specificity | Cut-off | Sensitivity | Specificity | Cut-off       | Sensitivity | Specificity | Cut-off | Sensitivity | Specificity | Cut-off | Sensitivity | Specificity |
| RMR, kcal/d                  | 1569    | 0.84        | 0.40        | 1609    | 0.86        | 0.40        | 1481          | 0.82        | 0.42        | 1628    | 0.85        | 0.50        | 1278    | 0.77        | 0.41        |
| RMR/BCM, kcal/kg             | 66      | 0.72        | 0.41        | 65      | 0.71        | 0.42        | 69            | 0.79        | 0.41        | 65      | 0.74        | 0.41        | -       | -           | -           |
| RMR/BSA, kcal/m <sup>2</sup> | 960     | 0.76        | 0.40        | 974     | 0.75        | 0.40        | -             | -           | -           | 997     | 0.84        | 0.41        | -       | -           | -           |

4 Abbreviation: RMR, resting metabolic rate; BCM, body cell mass; BSA, body surface area.
